# Supplementary material
Source: PubMed Central journal article supplement (PMC3298683)
Supplement: jbjs-2011-94-6-531-s1.pdf [file jbjs-2011-94-6-531-s1.pdf]

Wright eAppendix

TABLE E-1 Characteristics of the Included Studies

| Year | First Author                 | Level of Evidence | Distinguishing Study Characteristics*                        | Total No. of Patients | No. Analyzed | % of Total | Patients with at Least Two Years of Follow-up |                         |               |            |           |                         |            |           |                                |    |
|------|------------------------------|-------------------|--------------------------------------------------------------|-----------------------|--------------|------------|-----------------------------------------------|-------------------------|---------------|------------|-----------|-------------------------|------------|-----------|--------------------------------|----|
|      |                              |                   |                                                              |                       |              |            | Mean Duration of Follow-up (mo)               | Objective Failure (no.) | Mean Age (yr) | Sex† (no.) |           | Cause of Failure† (no.) |            |           | Revision Graft Material† (no.) |    |
|      |                              |                   |                                                              |                       |              |            |                                               |                         | Male          | Female     | Technical | Traumatic Reinjury      | Biological | Autograft | Allograft                      |    |
| 1996 | Johnson <sup>1</sup>         | IV                | Fresh-frozen irradiated (2.5 Mrad) BTB or Achilles tendon    | 25                    | 25           | 100        | 28                                            | 9                       | 25            | 22         | 3         | 13                      | 7          | 5         |                                | 25 |
| 1996 | Wirth <sup>4</sup>           | IV                | All BTB or quadriceps tendon                                 | 87                    | 87           | 100        | 96                                            |                         | 26            | 59         | 28        |                         |            |           | 87                             |    |
| 2001 | Colosimo <sup>13</sup>       | IV                | Reharvested ipsilateral BTB                                  | 15                    | 13           | 87         | 39.4                                          |                         | 27.2          | 10         | 3         | 11                      | 2          | 0         | 13                             |    |
| 2001 | Noyes <sup>21</sup>          | I                 | Prospective, BTB autograft                                   | 57                    | 55           | 96         | 33                                            | 13                      | 27            | 36         | 19        |                         | 44         |           | 39                             |    |
| 2001 | Woods <sup>28</sup>          | IV                | Lateral 1/3 BTB after central 1/3 failure                    | 13                    | 10           | 77         | 44.5                                          |                         | 30.8          | 5          | 5         |                         | 6          | 4         | 10                             |    |
| 2002 | O'Shea <sup>24</sup>         | IV                | Reharvested ipsilateral BTB                                  | 11                    | 11           | 100        | 51.5                                          |                         | 24.1          | 7          | 4         |                         | 10         |           | 11                             |    |
| 2004 | Carson <sup>12</sup>         | IV                | Multi-surgeon, variety of grafts                             | 52                    | 43           | 83         |                                               | 4                       | 27            | 49         | 41        |                         |            |           |                                |    |
| 2004 | Fox <sup>17</sup>            | IV                | Nonirradiated BTB allograft                                  | 38                    | 32           | 84         | 58                                            | 9                       | 28            | 14         | 18        |                         |            |           |                                | 32 |
| 2004 | O'Neill <sup>23</sup>        | I                 | Previously unharvested autograft                             | 50                    | 48           | 96         | 90                                            | 3                       | 33            | 28         | 20        | 20                      | 38         |           | 48                             |    |
| 2005 | Grossman <sup>19</sup>       | IV                | 1 institution, multi-surgeon                                 | 35                    | 29           | 83         | 67                                            | 1                       | 30.2          | 22         | 7         | 10                      | 14         | 5         | 28                             | 1  |
| 2005 | Thomas <sup>26</sup>         | III               | 2-stage with new femoral tunnel and tibial tunnel bone graft | 49                    | 49           | 100        | 75                                            | 3                       | 35.4          | 37         | 12        |                         |            |           | 49                             |    |
| 2006 | Ferretti <sup>16</sup>       | IV                | Hamstring autograft and lateral extra-articular procedure    | 30                    | 29           | 97         | 60                                            | 3                       | 34            | 22         | 8         | 14                      | 14         |           | 29                             |    |
| 2006 | Garofalo <sup>18</sup>       | IV                | Quadriceps tendon autograft                                  | 31                    | 28           | 90         | 50                                            |                         | 27            | 16         | 12        | 22                      | 28         |           | 28                             |    |
| 2006 | Lidén <sup>20</sup>          | IV                | Reharvested central 1/3 BTB                                  | 14                    | 14           | 100        | 115                                           | 1                       | 28            | 9          | 5         | 12                      | 2          |           | 14                             |    |
| 2006 | Noyes <sup>22</sup>          | IV                | Quadriceps tendon autograft                                  | 22                    | 21           | 95         | 49                                            | 4                       | 33            | 15         | 6         | 13                      | 9          |           | 21                             |    |
| 2006 | Salmon <sup>25</sup>         | IV                | Hamstring tendon autograft                                   | 57                    | 50           | 88         | 89                                            | 5                       | 27            | 36         | 9         | 11                      | 29         | 5         | 44                             | 1  |
| 2007 | Battaglia <sup>11</sup>      | IV                | Multi-surgeon, variety of grafts                             | 95                    | 63           | 66         | 72.7                                          | 21                      | 31            | 36         | 27        |                         |            |           | 43                             | 20 |
| 2007 | Weiler <sup>27</sup>         | II                | Hamstring autograft                                          | 62                    | 50           | 81         | 30                                            | 4                       | 31            | 31         | 19        |                         |            |           | 50                             |    |
| 2007 | Wright <sup>8</sup>          | I                 | Prospective, multi-surgeon, multicenter                      | 47                    | 39           | 83         |                                               | 2                       | 28.9          | 29         | 10        |                         |            |           |                                |    |
| 2008 | Denti <sup>14</sup>          | IV                | None                                                         | 66                    | 60           | 91         | 41.9                                          | 5                       | 31.2          | 58         | 8         | 34                      | 23         | 2         | 64                             | 2  |
| 2008 | Diamantopoulos <sup>15</sup> | IV                | All autografts                                               | 148                   | 107          | 72         | 72.9                                          | 7                       | 38.8          | 64         | 43        | 74                      | 26         | 4         | 107                            |    |

\*BTB = bone-patellar tendon-bone. †In some of the studies, the total for this category does not equal the number analyzed because a separate breakdown was not given for the subgroup with more than two years of follow-up
